# Supplementary material for: An efficient mesoporous carbon nitride (g-C3N4) functionalized Pd catalyst for carbon–carbon bond formation reactions
Source: Royal Society of Chemistry journal article supplement (doi:10.1039/c6ra04170a), 2016-01-01
Supplement: c6ra04170a1.pdf [file c6ra04170a1.pdf]

### **Supplementary Information**

#### **An Efficient mesoporous carbon nitrides (g-C<sub>3</sub>N<sub>4</sub>) functionalized Pd catalyst for carbon–carbon bond formation reactions**

*S. Elavarasan,<sup>a</sup> B. Baskar,<sup>a</sup> C. Senthil,<sup>a</sup> P. Bhanja,<sup>b</sup> A. Bhaumik,<sup>b</sup> P. Selvam,<sup>\*c</sup> and M. Sasidharan<sup>\*a</sup>*

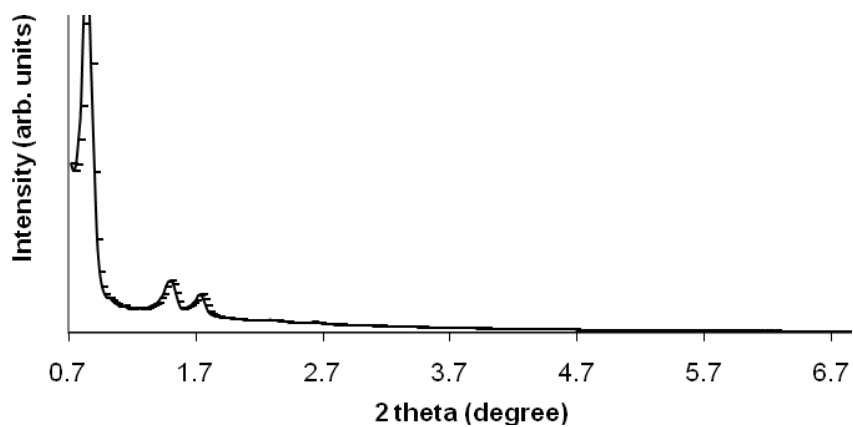

**Fig. S1.** XRD diffraction pattern of SBA-15-silica template

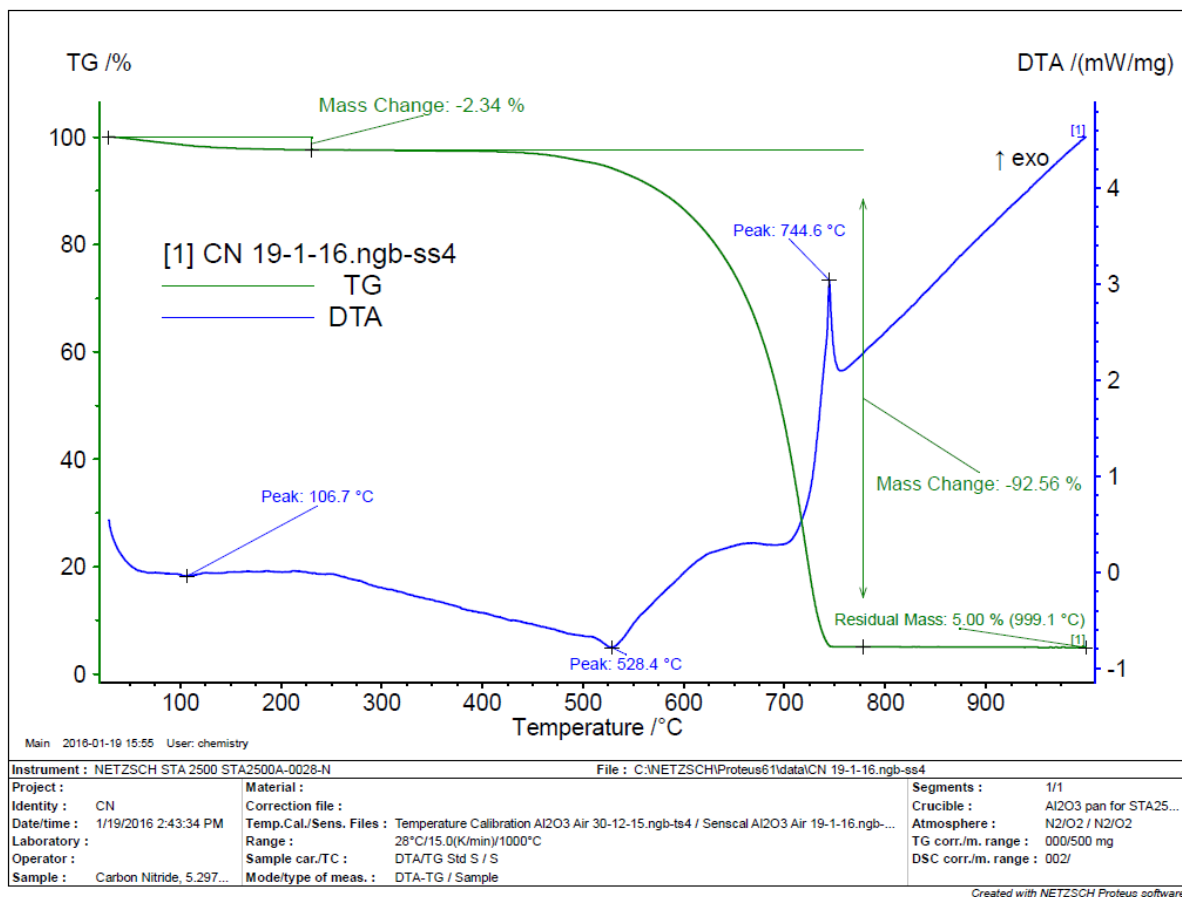

**Fig. S2.** TG/DTA curves of Mesoporous graphitic carbon nitrides

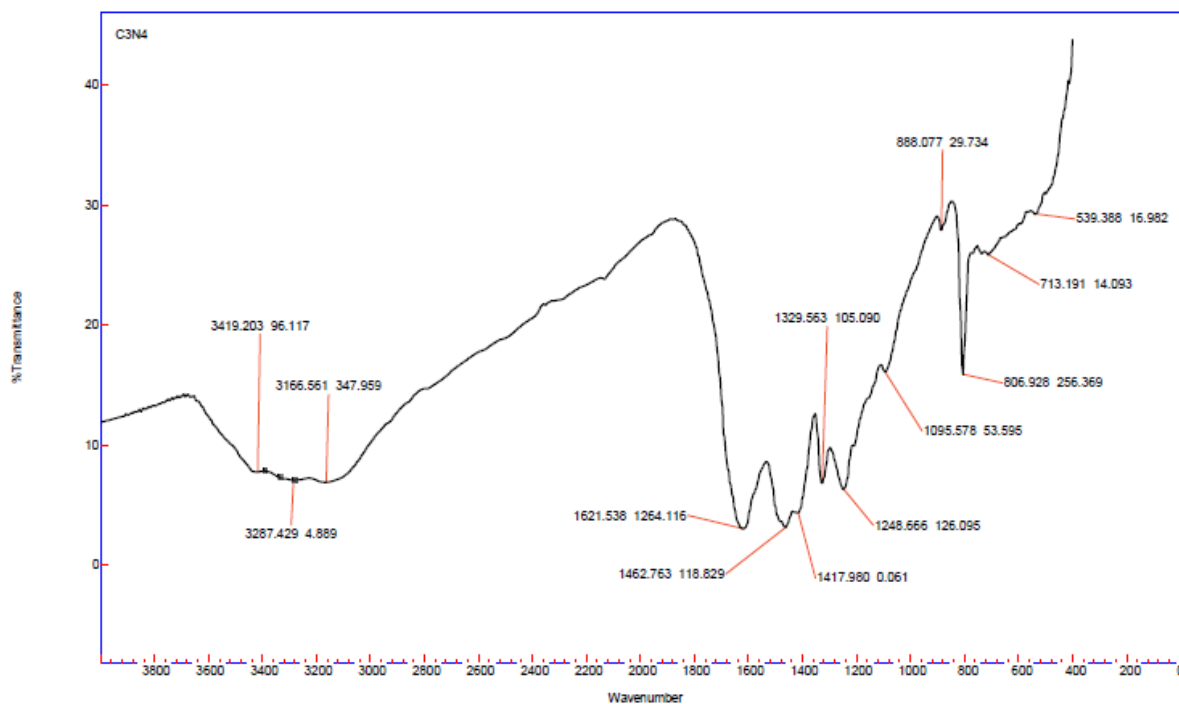

**Fig. S3.** FTIR spectrum of Mesoporous graphitic carbon nitrides

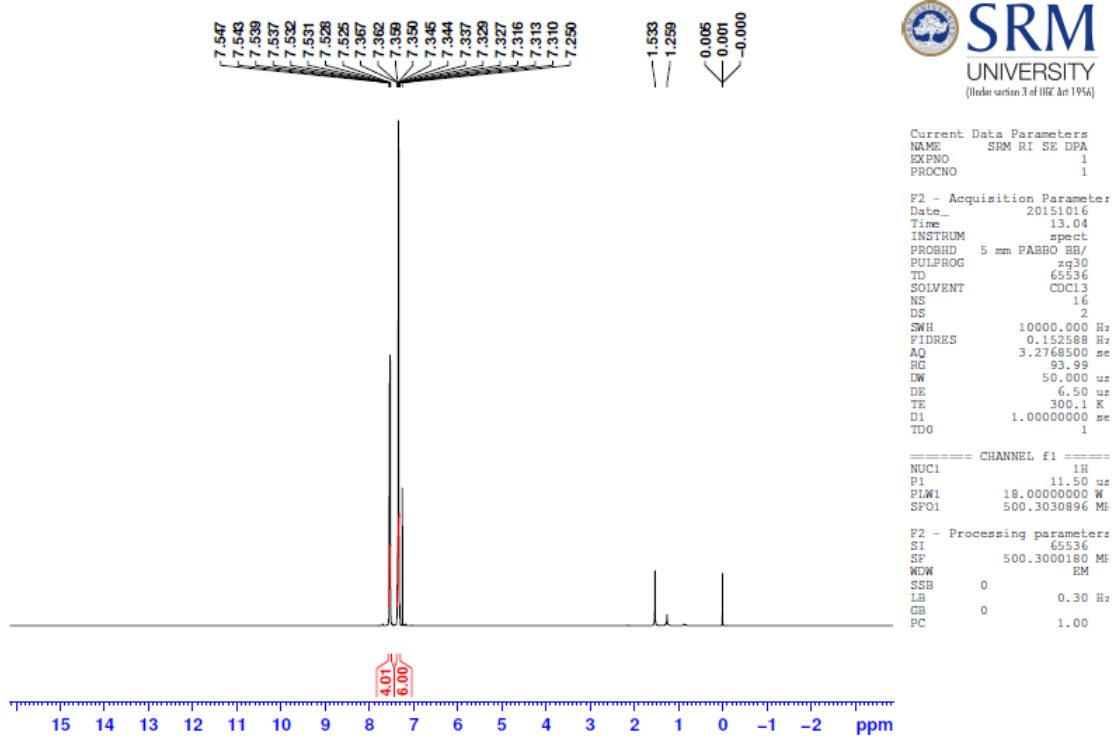

Fig. S4.  $^1\text{H}$  NMR spectrum of the product diphenyl acetylene

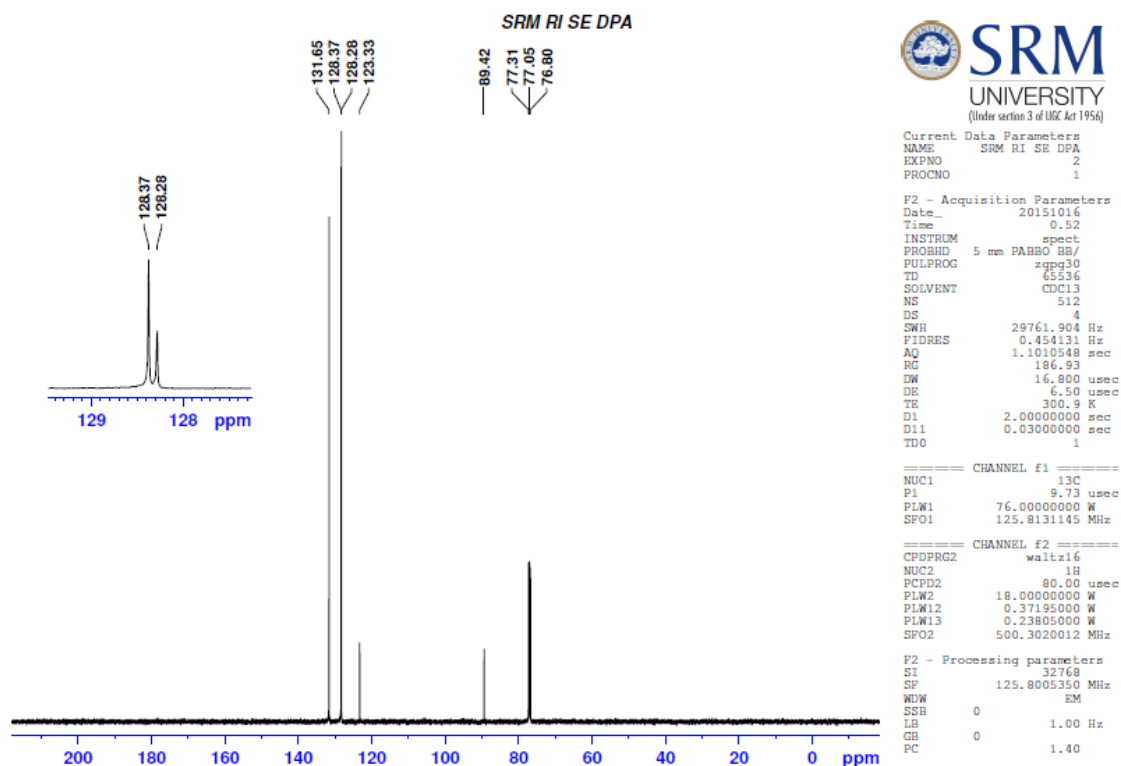

Fig. S5.  $^{13}\text{C}$  NMR spectrum of the product diphenyl acetylene

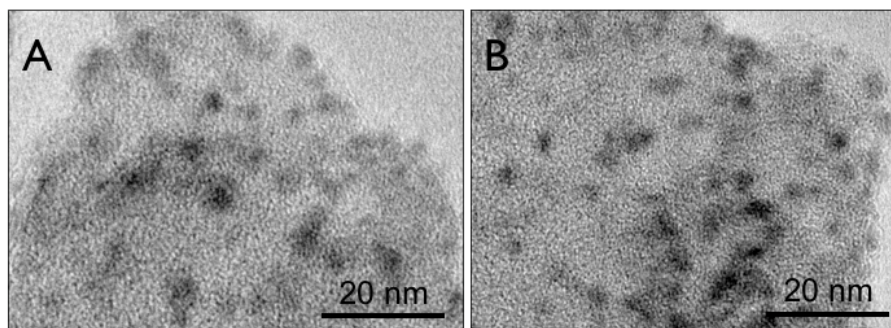

**Fig. S6.** TEM image of Pd(0)-MCN catalyst after: (A) First use and after 4 successive reuses.

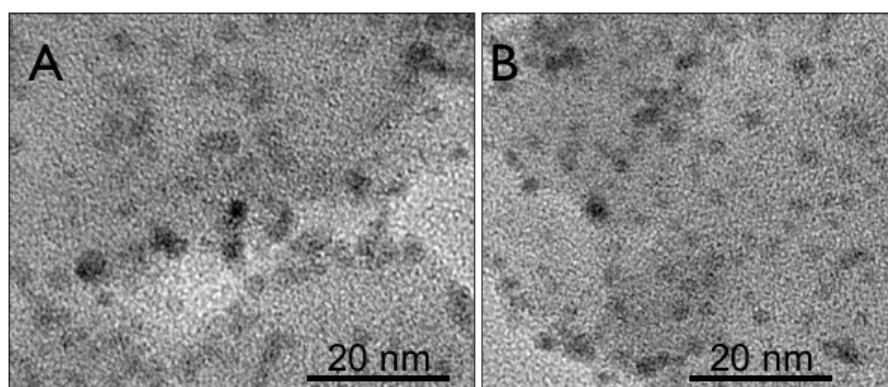

**Fig. S7.** TEM image of Pd(II)-MCN catalyst after: (A) First use and after 4 successive reuses.
